# Supplementary material for: The Mechanism Research of Qishen Yiqi Formula by Module-Network Analysis
Source: Hindawi journal article supplement (doi:10.1155/2015/497314), 2015-01-01
Supplement: f1 [file 497314.f1.zip]

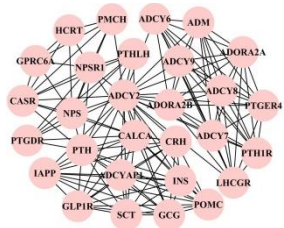

Module 1

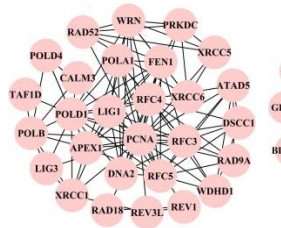

Module 2

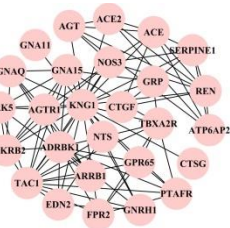

Module 3

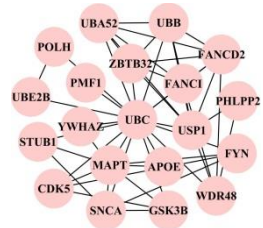

Module 4

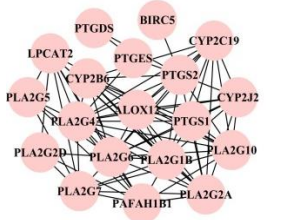

Module 5

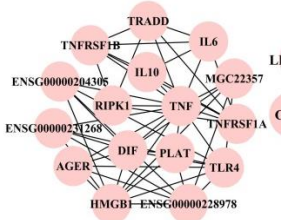

Module 6

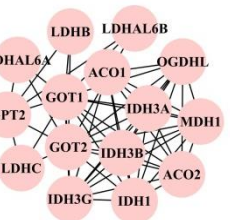

Module 7

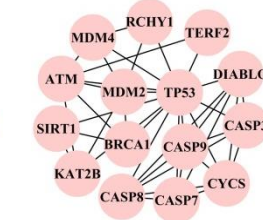

Module 8

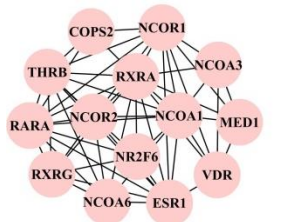

Module 9

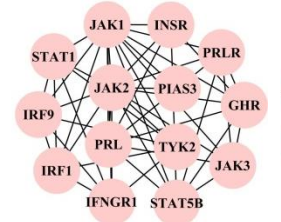

Module 10

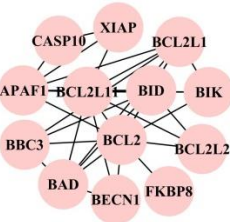

Module 11

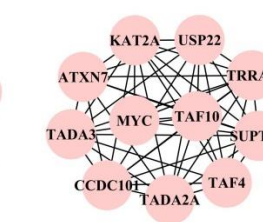

Module 12

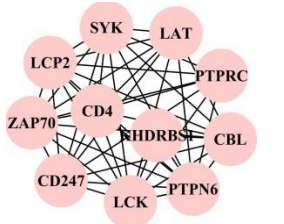

Module 13

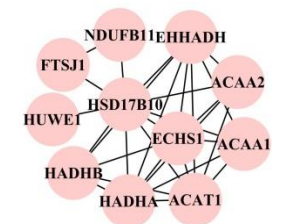

Module 14

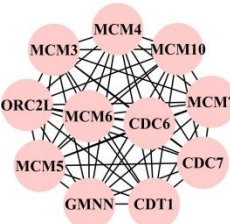

Module 15

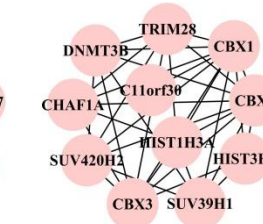

Module 16

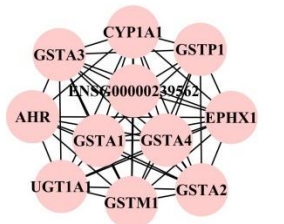

Module 17

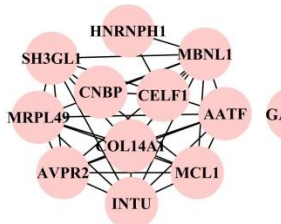

Module 18

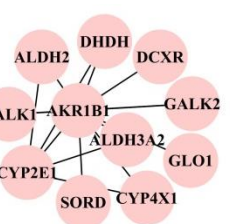

Module 19

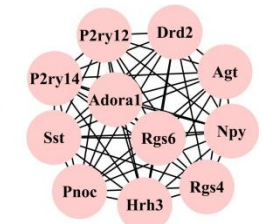

Module 20

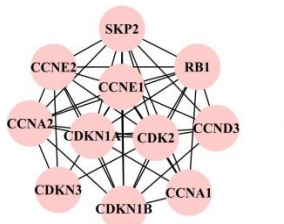

Module 21

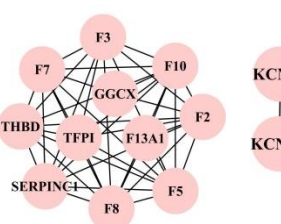

Module 22

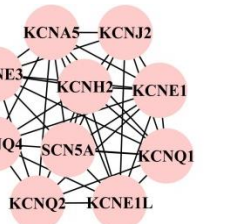

Module 23

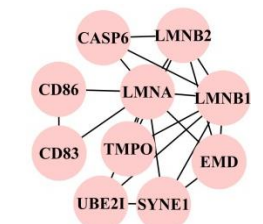

Module 24

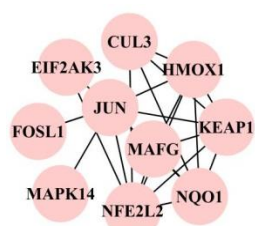

Module 25

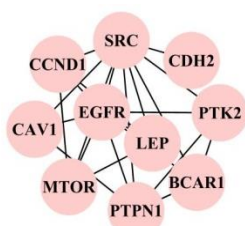

Module 26

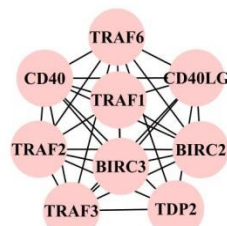

Module 27

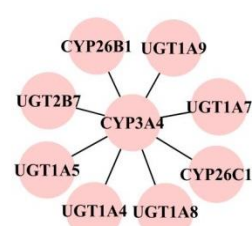

Module 28

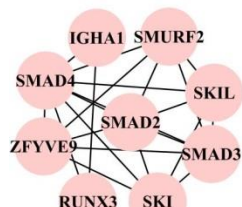

Module 29

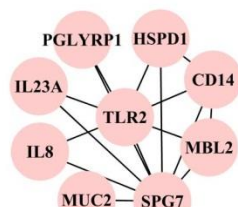

Module 30

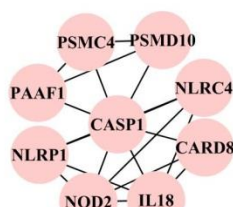

Module 31

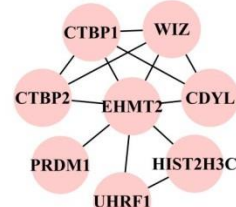

Module 32

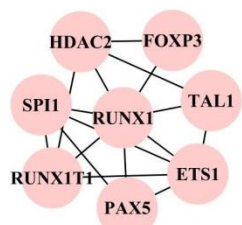

Module 33

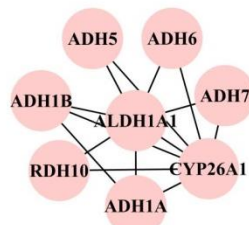

Module 34

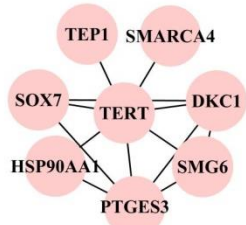

Module 35

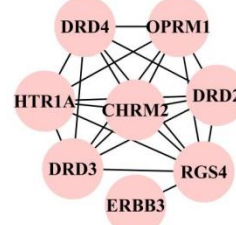

Module 36

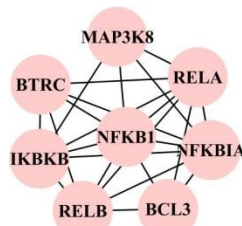

Module 37

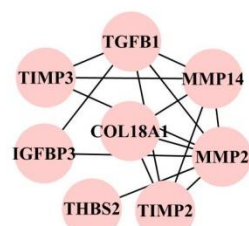

Module 38

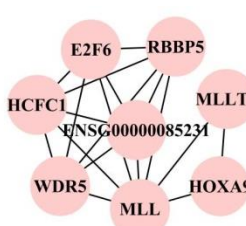

Module 39

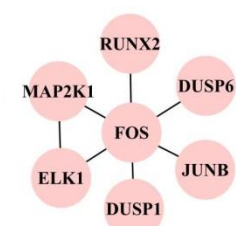

Module 40

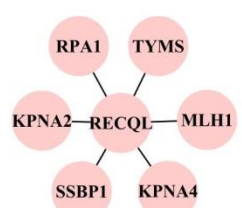

Module 41

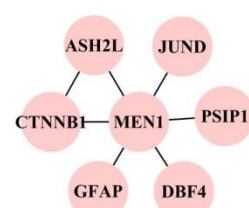

Module 42

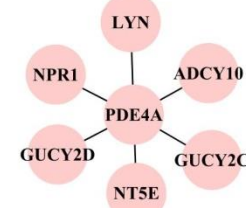

Module 43

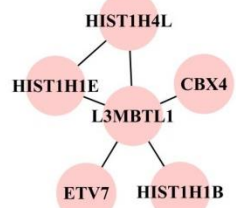

Module 44

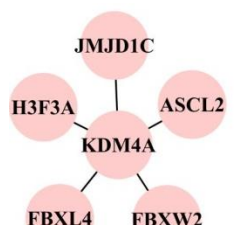

Module 45

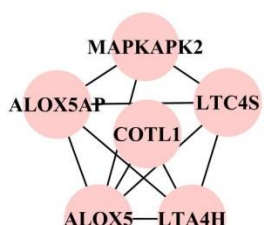

Module 46

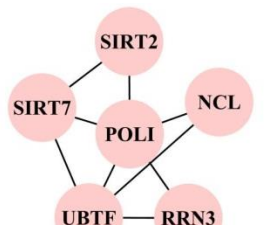

Module 47

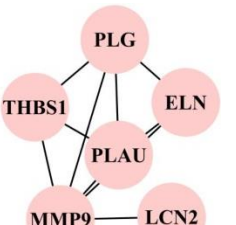

Module 48

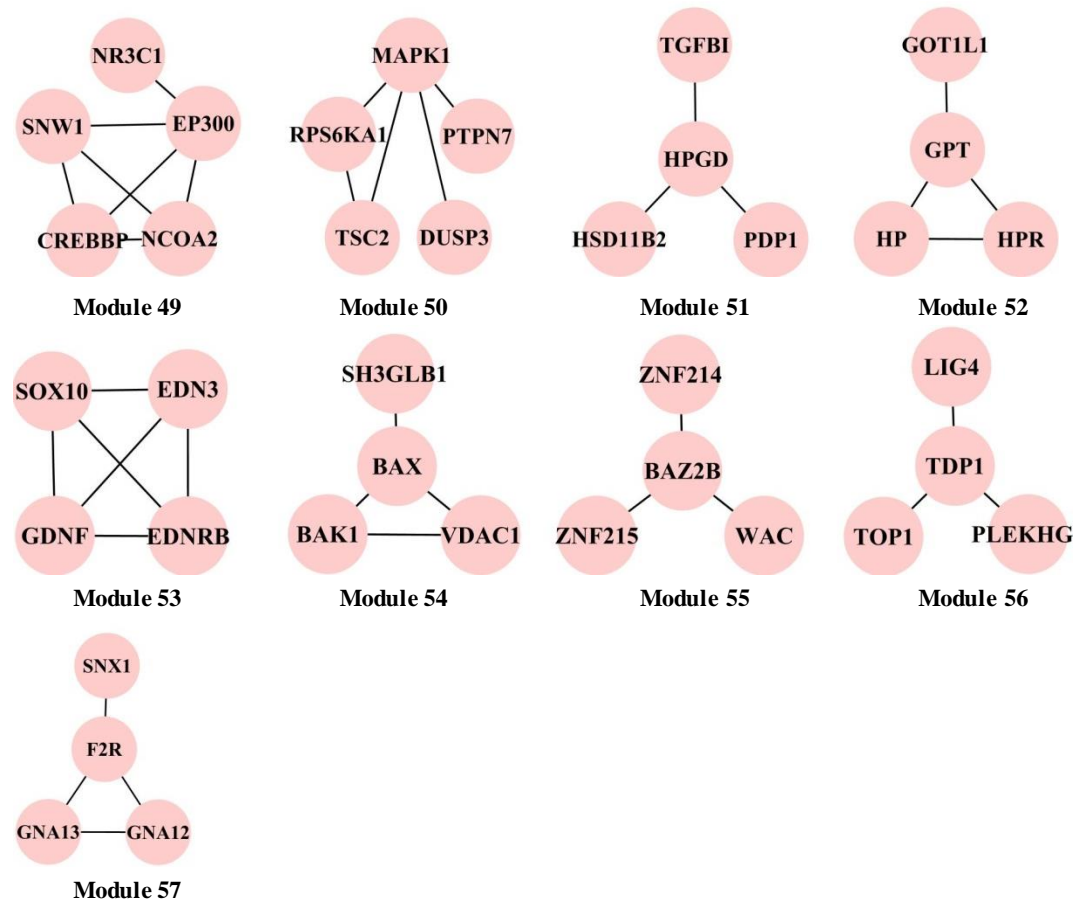

FIGURE S1: Modules in the PIN of *salvia miltiorrhiza*. With the MCL algorithm, 57 modules are extracted from the network.
