# Supplementary material for: The Mechanism Research of Qishen Yiqi Formula by Module-Network Analysis
Source: Hindawi journal article supplement (doi:10.1155/2015/497314), 2015-01-01
Supplement: f1 [file 497314.f1.zip]

TABLE S1: The additional targets' information of the active components of QSYQ

| Active ingredients | Targets  | UniProt ID | Source |
|--------------------|----------|------------|--------|
| tanshinone IIA     | AKR1B1   | P15121     | ChEMBL |
| tanshinone IIA     | ALDH1A1  | P00352     | ChEMBL |
| tanshinone IIA     | ALOX12   | P18054     | ChEMBL |
| tanshinone IIA     | APAF1    | O14727     | ChEMBL |
| tanshinone IIA     | ATAD5    | Q96QE3     | ChEMBL |
| tanshinone IIA     | BAZ2B    | Q9UIF8     | ChEMBL |
| tanshinone IIA     | CBFB     | Q13951     | ChEMBL |
| tanshinone IIA     | CBX1     | Q6IBN6     | ChEMBL |
| tanshinone IIA     | EHMT2    | Q96KQ7     | ChEMBL |
| tanshinone IIA     | FEN1     | P39748     | ChEMBL |
| tanshinone IIA     | HPGD     | P15428     | ChEMBL |
| tanshinone IIA     | HSD17B10 | Q99714     | ChEMBL |
| tanshinone IIA     | KAT2A    | Q92830     | ChEMBL |
| tanshinone IIA     | KDM4A    | O75164     | ChEMBL |
| tanshinone IIA     | KDM4DL   | B2RXH2     | ChEMBL |
| tanshinone IIA     | L3MBTL1  | Q9Y468     | ChEMBL |
| tanshinone IIA     | LMNA     | P02545     | ChEMBL |
| tanshinone IIA     | MAPK1    | P63085     | ChEMBL |
| tanshinone IIA     | MAPT     | P10636     | ChEMBL |
| tanshinone IIA     | MBNL1    | Q86VM6     | ChEMBL |
| tanshinone IIA     | MEN1     | O00255     | ChEMBL |
| tanshinone IIA     | MLL      | Q03164     | ChEMBL |
| tanshinone IIA     | NFE2L2   | Q68FB5     | ChEMBL |
| tanshinone IIA     | POLB     | P06746     | ChEMBL |
| tanshinone IIA     | POLH     | Q9Y253     | ChEMBL |
| tanshinone IIA     | POLI     | Q9UNA4     | ChEMBL |
| tanshinone IIA     | POLK     | Q9UBT6     | ChEMBL |
| tanshinone IIA     | RECQL    | P46063     | ChEMBL |
| tanshinone IIA     | RGS4     | P49798     | ChEMBL |
| tanshinone IIA     | RUNX1    | Q01196     | ChEMBL |
| tanshinone IIA     | SMAD3    | P84022     | ChEMBL |
| tanshinone IIA     | TDP1     | Q9NUW8     | ChEMBL |
| tanshinone IIA     | TP53     | P04637     | ChEMBL |
| tanshinone IIA     | USP1     | O94782     | ChEMBL |
| tanshinone IIA     | VDR      | P11473     | ChEMBL |
| tanshinone IIA     | CD40     | P25942     | STITCH |
| tanshinone IIA     | CYP1A1   | P04798     | STITCH |
| tanshinone IIA     | CYP3A4   | Q6GRK0     | STITCH |
| tanshinone IIA     | FSD1     | Q9BTV5     | STITCH |
| tanshinone IIA     | HMGB1    | P09429     | STITCH |
| tanshinone IIA     | KCNE1    | Q6FHJ6     | STITCH |
| tanshinone IIA     | NFKB1    | P19838     | STITCH |

|                    |         |        |               |
|--------------------|---------|--------|---------------|
| tanshinone IIA     | SPG7    | Q9UQ90 | STITCH        |
| tanshinone IIA     | TNF     | P01375 | STITCH        |
| tanshinone IIA     | PTAFR   | P25105 | Pharmacophore |
| cryptotanshinone   | ALDH1A1 | P00352 | ChEMBL        |
| cryptotanshinone   | ATAD5   | Q96QE3 | ChEMBL        |
| cryptotanshinone   | BAZ2B   | Q9UIF8 | ChEMBL        |
| cryptotanshinone   | CBX1    | Q6IBN6 | ChEMBL        |
| cryptotanshinone   | FEN1    | P39748 | ChEMBL        |
| cryptotanshinone   | GLP1R   | P43220 | ChEMBL        |
| cryptotanshinone   | GMNN    | O75496 | ChEMBL        |
| cryptotanshinone   | IDH1    | O75874 | ChEMBL        |
| cryptotanshinone   | KAT2A   | Q92830 | ChEMBL        |
| cryptotanshinone   | KDM4A   | O75164 | ChEMBL        |
| cryptotanshinone   | KDM4E   | B2RXH2 | ChEMBL        |
| cryptotanshinone   | RGS4    | P49798 | ChEMBL        |
| cryptotanshinone   | L3MBTL1 | Q9Y468 | ChEMBL        |
| cryptotanshinone   | MAPT    | P10636 | ChEMBL        |
| cryptotanshinone   | MBNL1   | Q86VM6 | ChEMBL        |
| cryptotanshinone   | MLL     | Q03164 | ChEMBL        |
| cryptotanshinone   | NFE2L2  | Q68FB5 | ChEMBL        |
| cryptotanshinone   | NPSR1   | B7ZMA2 | ChEMBL        |
| cryptotanshinone   | POLB    | P06746 | ChEMBL        |
| cryptotanshinone   | POLH    | Q9Y253 | ChEMBL        |
| cryptotanshinone   | POLI    | Q9UNA4 | ChEMBL        |
| cryptotanshinone   | POLK    | Q9UBT6 | ChEMBL        |
| cryptotanshinone   | RECQL   | P46063 | ChEMBL        |
| cryptotanshinone   | RGS4    | P49798 | ChEMBL        |
| cryptotanshinone   | TDP1    | Q9NUW8 | ChEMBL        |
| cryptotanshinone   | TERT    | O14746 | ChEMBL        |
| cryptotanshinone   | THRB    | P10828 | ChEMBL        |
| cryptotanshinone   | VDR     | P11473 | ChEMBL        |
| cryptotanshinone   | WRN     | Q14191 | ChEMBL        |
| cryptotanshinone   | BCL2    | P10415 | STITCH        |
| cryptotanshinone   | CYP3A4  | Q6GRK0 | STITCH        |
| cryptotanshinone   | EDN1    | Q6FH53 | STITCH        |
| cryptotanshinone   | PTGS2   | P35354 | STITCH        |
| cryptotanshinone   | STAT3   | P40763 | STITCH        |
| salvianolic acid A | LCK     | P06239 | ChEMBL        |
| salvianolic acid A | SRC     | P12931 | ChEMBL        |
| salvianolic acid A | STAT3   | P40763 | ChEMBL        |
| salvianolic acid A | STAT5B  | P51692 | ChEMBL        |
| salvianolic acid A | STAT1   | P42224 | ChEMBL        |
| salvianolic acid A | GPT2    | Q8TD30 | STITCH        |
| salvianolic acid A | GPT     | P24298 | STITCH        |

|                         |         |        |               |
|-------------------------|---------|--------|---------------|
| salvianolic acid A      | ACE     | P12821 | Pharmacophore |
| salvianolic acid A      | ADORA2B | P29275 | Pharmacophore |
| salvianolic acid A      | AGTR1   | Q53YY0 | Pharmacophore |
| salvianolic acid A      | ALOX5   | P09917 | Pharmacophore |
| salvianolic acid A      | CDK2    | P24941 | Pharmacophore |
| salvianolic acid A      | EDNRA   | P25101 | Pharmacophore |
| salvianolic acid A      | EDNRB   | P24530 | Pharmacophore |
| salvianolic acid A      | F10     | P00742 | Pharmacophore |
| salvianolic acid A      | F2R     | P25116 | Pharmacophore |
| salvianolic acid A      | PDE4A   | P27815 | Pharmacophore |
| salvianolic acid B      | LCK     | P06239 | ChEMBL        |
| salvianolic acid B      | SRC     | P12931 | ChEMBL        |
| salvianolic acid B      | STAT1   | P42224 | ChEMBL        |
| salvianolic acid B      | STAT3   | P40763 | ChEMBL        |
| salvianolic acid B      | STAT5B  | P51692 | ChEMBL        |
| salvianolic acid B      | BAX     | Q07812 | STITCH        |
| salvianolic acid B      | BCL2L1  | Q07817 | STITCH        |
| salvianolic acid B      | MMP2    | P08253 | STITCH        |
| salvianolic acid B      | MMP9    | P14780 | STITCH        |
| salvianolic acid B      | PTGS2   | P35354 | STITCH        |
| salvianolic acid B      | ACE     | P12821 | Pharmacophore |
| salvianolic acid B      | ADORA1  | P30542 | Pharmacophore |
| salvianolic acid B      | ADORA2B | P29275 | Pharmacophore |
| salvianolic acid B      | AGTR1   | Q53YY0 | Pharmacophore |
| salvianolic acid B      | ALOX5   | P09917 | Pharmacophore |
| salvianolic acid B      | CDK2    | P24941 | Pharmacophore |
| salvianolic acid B      | ECE1    | P42892 | Pharmacophore |
| salvianolic acid B      | EDNRA   | P25101 | Pharmacophore |
| salvianolic acid B      | EDNRB   | P24530 | Pharmacophore |
| salvianolic acid B      | F2R     | P25116 | Pharmacophore |
| salvianolic acid B      | PDE4A   | P27815 | Pharmacophore |
| tanshinol               | AGTR1   | Q53YY0 | Pharmacophore |
| tanshinol               | EDNRA   | P25101 | Pharmacophore |
| tanshinol               | EDNRB   | P24530 | Pharmacophore |
| tanshinol               | CDK2    | P24941 | Pharmacophore |
| tanshinol               | ACE     | P12821 | Pharmacophore |
| tanshinol               | ALOX5   | P09917 | Pharmacophore |
| tanshinol               | CASP1   | P29466 | Pharmacophore |
| tanshinol               | F10     | P00742 | Pharmacophore |
| protocatechuic aldehyde | POLI    | Q9UNA4 | ChEMBL        |
| protocatechuic aldehyde | KDM4A   | O75164 | ChEMBL        |
| protocatechuic aldehyde | GLS     | O94925 | ChEMBL        |
| protocatechuic aldehyde | KDM4E   | B2RXH2 | ChEMBL        |
| protocatechuic aldehyde | BAZ2B   | Q9UIF8 | ChEMBL        |

|                         |         |        |               |
|-------------------------|---------|--------|---------------|
| protocatechuic aldehyde | EHMT2   | Q96KQ7 | ChEMBL        |
| protocatechuic aldehyde | RAB9A   | P51151 | ChEMBL        |
| protocatechuic aldehyde | TNF     | P01375 | STITCH        |
| protocatechuic aldehyde | PLA2G7  | Q13093 | Pharmacophore |
| dencichine              | GLRX    | P35754 | STITCH        |
| dencichine              | GRIK1   | P39086 | STITCH        |
| dencichine              | CYP3A4  | Q6GRK0 | Pharmacophore |
| dencichine              | AKR1C3  | P42330 | Pharmacophore |
| dencichine              | PDE5A   | O76074 | Pharmacophore |
| dencichine              | PDE4B   | Q07343 | Pharmacophore |
| dencichine              | ACOT8   | O14734 | Pharmacophore |
| ginsenoside Rb1         | TOP1    | P11387 | ChEMBL        |
| ginsenoside Rb1         | TOP2A   | P11388 | ChEMBL        |
| ginsenoside Rb1         | ESR1    | P03372 | STITCH        |
| ginsenoside Rb1         | FOS     | P01100 | STITCH        |
| ginsenoside Rb1         | PGR     | Q5NUL3 | STITCH        |
| ginsenoside Rb1         | PIK3R1  | P27986 | STITCH        |
| ginsenoside Rb1         | PTGS2   | P35354 | STITCH        |
| ginsenoside Rb1         | RB1     | P06400 | STITCH        |
| ginsenoside Rb1         | RBL2    | Q08999 | STITCH        |
| ginsenoside Rb1         | RGN     | Q15493 | STITCH        |
| ginsenoside Rb1         | AGTR1   | Q53YY0 | Pharmacophore |
| ginsenoside Rb1         | EDNRB   | P24530 | Pharmacophore |
| ginsenoside Rb1         | PDE4A   | P27815 | Pharmacophore |
| ginsenoside Rb1         | ADORA1  | P30542 | Pharmacophore |
| ginsenoside Rb1         | ADORA2B | P29275 | Pharmacophore |
| ginsenoside Rg1         | IL2     | P60568 | STITCH        |
| ginsenoside Rg1         | NPM1    | P06748 | STITCH        |
| ginsenoside Rg1         | NR3C1   | P04150 | STITCH        |
| ginsenoside Rg1         | RB1     | P06400 | STITCH        |
| ginsenoside Rg1         | RBL2    | Q08999 | STITCH        |
| ginsenoside Rg1         | STMN4   | Q9H169 | STITCH        |
| ginsenoside Rg1         | THBS1   | A0PJG0 | STITCH        |
| ginsenoside Rg1         | TNF     | P01375 | STITCH        |
| ginsenoside Rg1         | VEGFA   | P15692 | STITCH        |
| ginsenoside Rg1         | ADORA2B | P29275 | Pharmacophore |
| ginsenoside Rg1         | ADORA1  | P30542 | Pharmacophore |
| ginsenoside Rg1         | AGTR1   | Q53YY0 | Pharmacophore |
| ginsenoside Rg1         | CASP1   | P29466 | Pharmacophore |
| ginsenoside Rg1         | EDNRA   | P25101 | Pharmacophore |
| ginsenoside Rg1         | EDNRB   | P24530 | Pharmacophore |
| ginsenoside Rg1         | F2R     | P25116 | Pharmacophore |
| ginsenoside Rg1         | HMGCR   | P04035 | Pharmacophore |
| ginsenoside Rg1         | PDE4A   | P27815 | Pharmacophore |

|                    |           |        |               |
|--------------------|-----------|--------|---------------|
| notoginsenoside R1 | RB1       | P06400 | STITCH        |
| notoginsenoside R1 | RBL2      | Q08999 | STITCH        |
| notoginsenoside R1 | RGN       | Q15493 | STITCH        |
| notoginsenoside R1 | STMN4     | Q9H169 | STITCH        |
| notoginsenoside R1 | TNF       | P01375 | STITCH        |
| notoginsenoside R1 | ADORA1    | P30542 | Pharmacophore |
| notoginsenoside R1 | ADORA2B   | P29275 | Pharmacophore |
| notoginsenoside R1 | AGTR1     | Q53YY0 | Pharmacophore |
| notoginsenoside R1 | CASP1     | P29466 | Pharmacophore |
| notoginsenoside R1 | EDNRB     | P24530 | Pharmacophore |
| notoginsenoside R1 | PDE4A     | P27815 | Pharmacophore |
| butein             | EGFR      | Q504U8 | ChEMBL        |
| butein             | FGFR1     | P11362 | ChEMBL        |
| butein             | FGFR2     | P21802 | ChEMBL        |
| butein             | GBA       | P04062 | ChEMBL        |
| butein             | HSPA5     | P11021 | ChEMBL        |
| butein             | KDR       | P35968 | ChEMBL        |
| butein             | APEX1     | Q5TZP7 | ChEMBL        |
| butein             | CDK2      | P24941 | ChEMBL        |
| butein             | KIT       | P10721 | ChEMBL        |
| butein             | MET       | P08581 | ChEMBL        |
| butein             | POLK      | Q9UBT6 | ChEMBL        |
| butein             | SRC       | P12931 | ChEMBL        |
| butein             | VDR       | P11473 | ChEMBL        |
| butein             | BCL2      | P10415 | STITCH        |
| butein             | CXCR4     | P61073 | STITCH        |
| butein             | MMP7      | P09237 | STITCH        |
| butein             | MMP9      | P14780 | STITCH        |
| butein             | PTPN3     | P26045 | STITCH        |
| butein             | PTPN6     | P29350 | STITCH        |
| butein             | STAT3     | P40763 | STITCH        |
| butein             | TNF       | P01375 | STITCH        |
| butein             | TNFRSF10B | Q6FH58 | STITCH        |
| butein             | TNFSF10   | Q6IBA9 | STITCH        |
| formononetin       | AL1A1     | P00352 | ChEMBL        |
| formononetin       | NF2L2     | Q16236 | ChEMBL        |
| formononetin       | MAPT      | P10636 | ChEMBL        |
| formononetin       | KDM4E     | B2RXH2 | ChEMBL        |
| formononetin       | SMN1      | Q16637 | ChEMBL        |
| formononetin       | HPGD      | P15428 | ChEMBL        |
| formononetin       | HSPA5     | P11021 | ChEMBL        |
| formononetin       | GLS       | O94925 | ChEMBL        |
| formononetin       | CP1A1     | P04798 | ChEMBL        |
| formononetin       | PPARG     | P37231 | ChEMBL        |

|                   |          |        |               |
|-------------------|----------|--------|---------------|
| formononetin      | PPARA    | Q07869 | ChEMBL        |
| formononetin      | CP2D6    | P10635 | ChEMBL        |
| formononetin      | ABCC1    | P33527 | ChEMBL        |
| formononetin      | CP2C9    | P11712 | ChEMBL        |
| formononetin      | CP3A4    | P08684 | ChEMBL        |
| formononetin      | CP2CJ    | P33261 | ChEMBL        |
| formononetin      | SLC5A2   | P31639 | ChEMBL        |
| formononetin      | TP53     | P04637 | ChEMBL        |
| formononetin      | HSD17B10 | Q99714 | ChEMBL        |
| formononetin      | SLC5A1   | A4QPH0 | ChEMBL        |
| formononetin      | BRCA1    | Q3B891 | ChEMBL        |
| formononetin      | CASP1    | P29466 | Pharmacophore |
| formononetin      | BDKRB2   | P30411 | Pharmacophore |
| formononetin      | ALOX5    | P09917 | Pharmacophore |
| formononetin      | EDNRB    | P24530 | Pharmacophore |
| formononetin      | CDK2     | P24941 | Pharmacophore |
| formononetin      | AGTR1    | Q53YY0 | Pharmacophore |
| isoliquiritigenin | AKR1B1   | P15121 | ChEMBL        |
| isoliquiritigenin | NFE2L2   | Q68FB5 | ChEMBL        |
| isoliquiritigenin | MAPT     | P10636 | ChEMBL        |
| isoliquiritigenin | LMNA     | P02545 | ChEMBL        |
| isoliquiritigenin | BLM      | P54132 | ChEMBL        |
| isoliquiritigenin | HPGD     | P15428 | ChEMBL        |
| isoliquiritigenin | SMAD3    | P84022 | ChEMBL        |
| isoliquiritigenin | GMNN     | O75496 | ChEMBL        |
| isoliquiritigenin | PMP22    | Q01453 | ChEMBL        |
| isoliquiritigenin | MLL      | Q03164 | ChEMBL        |
| isoliquiritigenin | CBX1     | Q6IBN6 | ChEMBL        |
| isoliquiritigenin | ATAD5    | Q96QE3 | ChEMBL        |
| isoliquiritigenin | MPHOSPH8 | Q99549 | ChEMBL        |
| isoliquiritigenin | HSPA5    | P11021 | ChEMBL        |
| isoliquiritigenin | GLP1R    | P43220 | ChEMBL        |
| isoliquiritigenin | ATXN2    | Q24JQ7 | ChEMBL        |
| isoliquiritigenin | USP1     | O94782 | ChEMBL        |
| isoliquiritigenin | KIT      | P10721 | ChEMBL        |
| isoliquiritigenin | VDR      | P11473 | ChEMBL        |
| isoliquiritigenin | EGFR     | Q504U8 | ChEMBL        |
| isoliquiritigenin | DRD1     | P21728 | ChEMBL        |
| isoliquiritigenin | GBA      | P04062 | ChEMBL        |
| isoliquiritigenin | PIN1     | Q13526 | ChEMBL        |
| isoliquiritigenin | PPARG    | P37231 | ChEMBL        |
| isoliquiritigenin | KCNH2    | Q12809 | ChEMBL        |
| isoliquiritigenin | SRC      | P12931 | ChEMBL        |
| isoliquiritigenin | KDR      | P35968 | ChEMBL        |

|                   |         |        |               |
|-------------------|---------|--------|---------------|
| isoliquiritigenin | MTOR    | P42345 | ChEMBL        |
| isoliquiritigenin | MMP9    | P14780 | ChEMBL        |
| isoliquiritigenin | PTPN1   | P18031 | ChEMBL        |
| isoliquiritigenin | CYP2C9  | P11712 | ChEMBL        |
| isoliquiritigenin | CYP3A4  | Q6GRK0 | ChEMBL        |
| isoliquiritigenin | CYP2C19 | P33261 | ChEMBL        |
| isoliquiritigenin | FGFR1   | P11362 | ChEMBL        |
| isoliquiritigenin | MET     | P08581 | ChEMBL        |
| isoliquiritigenin | TP53    | P04637 | ChEMBL        |
| isoliquiritigenin | FGFR2   | P21802 | ChEMBL        |
| isoliquiritigenin | JUN     | P05412 | ChEMBL        |
| isoliquiritigenin | FEN1    | P39748 | ChEMBL        |
| isoliquiritigenin | NPSR1   | B7ZMA2 | ChEMBL        |
| isoliquiritigenin | POLK    | Q9UBT6 | ChEMBL        |
| isoliquiritigenin | POLI    | Q9UNA4 | ChEMBL        |
| isoliquiritigenin | RELA    | Q2TAM5 | ChEMBL        |
| isoliquiritigenin | APEX1   | Q5TZP7 | ChEMBL        |
| isoliquiritigenin | EHMT2   | Q96KQ7 | ChEMBL        |
| isoliquiritigenin | ALOX12  | P18054 | STITCH        |
| isoliquiritigenin | ALOX12B | O75342 | STITCH        |
| isoliquiritigenin | CASP3   | P42574 | STITCH        |
| isoliquiritigenin | NFKBIA  | P25963 | STITCH        |
| isoliquiritigenin | SLC2A1  | P11166 | STITCH        |
| isoliquiritigenin | TNF     | P01375 | STITCH        |
| nerolidol         | ALOX15  | P16050 | ChEMBL        |
| nerolidol         | THRB    | P10828 | ChEMBL        |
| nerolidol         | USP1    | O94782 | ChEMBL        |
| calycosin         | APEX1   | Q5TZP7 | ChEMBL        |
| calycosin         | BRCA1   | Q3B891 | ChEMBL        |
| calycosin         | KDM4E   | B2RXH2 | ChEMBL        |
| calycosin         | MAPT    | P10636 | ChEMBL        |
| calycosin         | NPC1    | O15118 | ChEMBL        |
| calycosin         | POLB    | P06746 | ChEMBL        |
| calycosin         | POLI    | Q9UNA4 | ChEMBL        |
| calycosin         | RAB9A   | P51151 | ChEMBL        |
| astragaloside I   | NFKB1   | P19838 | STITCH        |
| astragaloside I   | ADORA1  | P30542 | Pharmacophore |
| astragaloside I   | ADORA2B | P29275 | Pharmacophore |
| astragaloside I   | AGTR1   | Q53YY0 | Pharmacophore |
| astragaloside I   | EDNRA   | P25101 | Pharmacophore |
| astragaloside I   | EDNRB   | P24530 | Pharmacophore |
| astragaloside I   | F2R     | P25116 | Pharmacophore |
| astragaloside IV  | TYR     | P14679 | ChEMBL        |
| astragaloside IV  | MMP2    | P08253 | STITCH        |

|                  |         |        |               |
|------------------|---------|--------|---------------|
| astragaloside IV | TNNI3   | P19429 | STITCH        |
| astragaloside IV | ADORA1  | P30542 | Pharmacophore |
| astragaloside IV | ADORA2B | P29275 | Pharmacophore |
| astragaloside IV | AGTR1   | Q53YY0 | Pharmacophore |
| astragaloside IV | CASP1   | P29466 | Pharmacophore |
| astragaloside IV | EDNRA   | P25101 | Pharmacophore |
| astragaloside IV | EDNRB   | P24530 | Pharmacophore |
| astragaloside IV | F2R     | P25116 | Pharmacophore |

---
