# Supplementary material for: The Mechanism Research of Qishen Yiqi Formula by Module-Network Analysis
Source: Hindawi journal article supplement (doi:10.1155/2015/497314), 2015-01-01
Supplement: f1 [file 497314.f1.zip]

TABLE S5: GO biological process terms of the modules of *astragalus membranaceus*

| Modules | p-value  | GO terms                                             |
|---------|----------|------------------------------------------------------|
| 1       | 3.30E-19 | regulation of blood vessel size                      |
| 2       | 1.15E-17 | positive regulation of RNA metabolic process         |
| 3       | 7.10E-35 | xenobiotic metabolic process                         |
| 4       | 2.68E-10 | regulation of apoptotic process                      |
| 5       | 1.17E-22 | blood coagulation                                    |
| 6       | 5.23E-12 | DNA metabolic process                                |
| 7       | 1.27E-13 | cyclic nucleotide metabolic process                  |
| 8       | 7.98E-11 | cellular lipid metabolic process                     |
| 9       | 2.50E-22 | cellular amino acid catabolic process                |
| 10      | 8.04E-12 | fatty acid beta-oxidation                            |
| 11      | 1.25E-19 | cell cycle phase transition                          |
| 12      | 2.77E-29 | muscle filament sliding                              |
| 13      | 1.57E-11 | cellular amino acid metabolic process                |
| 14      | 1.68E-17 | xenobiotic metabolic process                         |
| 15      | 4.10E-10 | cellular lipid metabolic process                     |
| 16      | 1.83E-11 | DNA metabolic process                                |
| 17      | 1.03E-11 | positive regulation of nuclease activity             |
| 18      | 3.52E-17 | mRNA metabolic process                               |
| 19      | 2.74E-13 | positive regulation of interleukin-1 beta production |
| 20      | 9.09E-15 | toll-like receptor 1 signaling pathway               |
| 21      | 2.95E-07 | regulation of cell migration                         |
| 22      | 1.38E-06 | cellular macromolecule biosynthetic process          |
| 23      | 3.48E-09 | positive regulation of cytokine production           |
| 24      | 1.92E-11 | xenobiotic metabolic process                         |
| 25      | 9.07E-07 | epidermal growth factor receptor signaling pathway   |
| 26      | 1.64E-04 | lipoxygenase pathway                                 |
| 27      | 2.70E-10 | angiogenesis                                         |
| 29      | 2.91E-08 | cholesterol transport                                |

Notes: P-value is the probability of obtaining the observed effect, a very small P-value indicates that the observed effect is very unlikely to have arisen purely by chance, and therefore provides evidence against the null hypothesis.
