# Supplementary material for: The Mechanism Research of Qishen Yiqi Formula by Module-Network Analysis
Source: Hindawi journal article supplement (doi:10.1155/2015/497314), 2015-01-01
Supplement: f1 [file 497314.f1.zip]

TABLE S4: GO biological process terms of the modules of *dalbergia odorifera*

| Modules | p-value   | GO terms                                                         |
|---------|-----------|------------------------------------------------------------------|
| 1       | 3.992E-17 | regulation of cell death                                         |
| 2       | 1.982E-23 | regulation of cAMP metabolic process                             |
| 3       | 4.068E-32 | DNA repair                                                       |
| 4       | 3.64E-24  | transmembrane receptor protein tyrosine kinase signaling pathway |
| 5       | 4.561E-17 | RNA biosynthetic process                                         |
| 6       | 5.011E-16 | DNA damage checkpoint                                            |
| 7       | 4.799E-25 | apoptotic process                                                |
| 8       | 2.203E-33 | xenobiotic metabolic process                                     |
| 9       | 7.861E-15 | G-protein coupled receptor signaling pathway                     |
| 10      | 5.994E-13 | positive regulation of RNA metabolic process                     |
| 11      | 4.262E-14 | transmembrane receptor protein tyrosine kinase signaling pathway |
| 12      | 1.189E-22 | cell cycle phase transition                                      |
| 13      | 1.547E-06 | regulation of protein metabolic process                          |
| 14      | 4.773E-05 | RNA metabolic process                                            |
| 15      | 2.03E-27  | potassium ion transport                                          |
| 16      | 2.706E-06 | regulation of RNA metabolic process                              |
| 17      | 2.065E-11 | cellular lipid metabolic process                                 |
| 18      | 2.379E-14 | lipid metabolic process                                          |
| 19      | 1.128E-09 | carbohydrate metabolic process                                   |
| 20      | 2.499E-22 | cellular amino acid catabolic process                            |
| 21      | 3.767E-08 | lipid catabolic process                                          |
| 22      | 3.684E-11 | RNA biosynthetic process                                         |
| 23      | 1.252E-19 | cell cycle phase transition                                      |
| 24      | 1.699E-12 | apoptotic process                                                |
| 25      | 3.268E-12 | xenobiotic metabolic process                                     |
| 26      | 9.255E-19 | mRNA processing                                                  |
| 27      | 2.036E-14 | transmembrane receptor protein tyrosine kinase signaling pathway |
| 28      | 2.315E-06 | execution phase of apoptosis                                     |
| 29      | 6.229E-11 | regulation of interleukin-1 secretion                            |
| 30      | 2.361E-13 | toll-like receptor signaling pathway                             |
| 31      | 7.594E-06 | inflammatory response                                            |
| 32      | 6.836E-05 | regulation of cell proliferation                                 |
| 33      | 3.177E-06 | negative regulation of RNA metabolic process                     |
| 34      | 1.672E-18 | insulin receptor signaling pathway                               |
| 35      | 1.174E-10 | cell cycle phase                                                 |
| 36      | 2.65E-07  | immune response-regulating signaling pathway                     |
| 37      | 1.364E-11 | regulation of inflammatory response                              |
| 38      | 3.78E-18  | vascular endothelial growth factor receptor signaling pathway    |
| 39      | 5.556E-07 | transmission of nerve impulse                                    |
| 40      | 7.042E-07 | regulation of blood coagulation                                  |
| 41      | 8.928E-06 | transcription initiation from RNA polymerase I promoter          |
| 42      | 8.087E-12 | insulin receptor signaling pathway                               |

|    |           |                                               |
|----|-----------|-----------------------------------------------|
| 43 | 3.221E-09 | xenobiotic metabolic process                  |
| 44 | 4.173E-05 | transcription from RNA polymerase II promoter |
| 45 | 0.0006571 | positive regulation of exit from mitosis      |
| 47 | 3.882E-06 | regulation of response to interferon-gamma    |
| 49 | 1.273E-11 | neural crest cell migration                   |

---

*Notes:* P-value is the probability of obtaining the observed effect, a very small P-value indicates that the observed effect is very unlikely to have arisen purely by chance, and therefore provides evidence against the null hypothesis.
