# Supplementary material for: The Mechanism Research of Qishen Yiqi Formula by Module-Network Analysis
Source: Hindawi journal article supplement (doi:10.1155/2015/497314), 2015-01-01
Supplement: f1 [file 497314.f1.zip]

TABLE S3: GO biological process terms of the modules of *panax notoginseng*

| Modules | p-value   | GO terms                                                         |
|---------|-----------|------------------------------------------------------------------|
| 1       | 2.888E-21 | G-protein coupled receptor signaling pathway                     |
| 2       | 2.363E-16 | cell cycle                                                       |
| 3       | 4.133E-16 | cell cycle                                                       |
| 4       | 1.203E-15 | nucleotide metabolic process                                     |
| 5       | 1.461E-16 | G-protein coupled receptor signaling pathway                     |
| 6       | 9.556E-23 | xenobiotic metabolic process                                     |
| 7       | 2.42E-14  | lipid metabolic process                                          |
| 8       | 1.291E-12 | toll-like receptor signaling pathway                             |
| 9       | 1.072E-13 | transmembrane receptor protein tyrosine kinase signaling pathway |
| 10      | 6.229E-11 | regulation of interleukin-1 secretion                            |
| 11      | 3.727E-10 | xenobiotic metabolic process                                     |
| 12      | 5.738E-11 | regulation of blood coagulation                                  |
| 13      | 1.077E-10 | regulation of inflammatory response                              |
| 14      | 2.081E-08 | negative regulation of inflammatory response                     |
| 15      | 6.161E-11 | vascular endothelial growth factor receptor signaling pathway    |
| 16      | 4.079E-06 | apoptotic process                                                |
| 17      | 1.355E-07 | positive regulation of RNA metabolic process                     |
| 18      | 1.326E-09 | cell cycle                                                       |
| 19      | 5.579E-09 | cellular lipid metabolic process                                 |
| 20      | 3.841E-08 | lipid metabolic process                                          |
| 21      | 3.239E-08 | copper ion import                                                |
| 22      | 1.406E-05 | cAMP metabolic process                                           |
| 23      | 0.0002926 | cellular lipid metabolic process                                 |
| 24      | 4.625E-07 | regulation of blood coagulation                                  |
| 25      | 2.904E-08 | transmission of nerve impulse                                    |

Notes: P-value is the probability of obtaining the observed effect, a very small P-value indicates that the observed effect is very unlikely to have arisen purely by chance, and therefore provides evidence against the null hypothesis.
