# Supplementary material for: The Mechanism Research of Qishen Yiqi Formula by Module-Network Analysis
Source: Hindawi journal article supplement (doi:10.1155/2015/497314), 2015-01-01
Supplement: f1 [file 497314.f1.zip]

TABLE S2: GO biological process terms of the modules of *salvia miltiorrhiza*

| Modules | p-value  | GO terms                                                  |
|---------|----------|-----------------------------------------------------------|
| 1       | 6.20E-23 | regulation of cAMP metabolic process                      |
| 2       | 6.26E-33 | DNA repair                                                |
| 3       | 4.37E-16 | G-protein coupled receptor signaling pathway              |
| 4       | 1.74E-11 | DNA repair                                                |
| 5       | 9.10E-22 | lipid metabolic process                                   |
| 6       | 5.94E-13 | inflammatory response                                     |
| 7       | 9.19E-20 | tricarboxylic acid cycle                                  |
| 8       | 6.81E-17 | apoptotic signaling pathway                               |
| 9       | 2.44E-15 | RNA biosynthetic process                                  |
| 10      | 1.24E-11 | interferon-gamma-mediated signaling pathway               |
| 11      | 1.13E-16 | apoptotic process                                         |
| 12      | 2.83E-16 | chromatin organization                                    |
| 13      | 2.33E-17 | immune response-regulating signaling pathway              |
| 14      | 3.77E-08 | lipid catabolic process                                   |
| 15      | 1.19E-22 | cell cycle phase transition                               |
| 16      | 2.71E-06 | regulation of RNA metabolic process                       |
| 17      | 1.61E-20 | xenobiotic metabolic process                              |
| 18      | 2.53E-06 | regulation of RNA splicing                                |
| 19      | 1.13E-09 | carbohydrate metabolic process                            |
| 20      | 8.28E-16 | G-protein coupled receptor signaling pathway              |
| 21      | 1.25E-19 | cell cycle phase transition                               |
| 22      | 3.71E-08 | regulation of blood coagulation                           |
| 23      | 1.39E-15 | potassium ion transport                                   |
| 24      | 2.31E-06 | execution phase of apoptosis                              |
| 25      | 7.03E-07 | regulation of apoptotic process                           |
| 26      | 3.93E-07 | positive regulation of cellular protein metabolic process |
| 27      | 6.72E-10 | regulation of immune response                             |
| 28      | 3.37E-18 | xenobiotic metabolic process                              |
| 29      | 5.27E-11 | DNA-dependent transcription                               |
| 30      | 5.23E-08 | regulation of immune response                             |
| 31      | 3.74E-11 | regulation of interleukin-1 secretion                     |
| 32      | 3.18E-06 | negative regulation of RNA metabolic process              |
| 33      | 8.15E-09 | positive regulation of RNA metabolic process              |
| 34      | 4.39E-13 | xenobiotic metabolic process                              |
| 35      | 4.50E-07 | DNA metabolic process                                     |
| 36      | 9.06E-11 | negative regulation of cAMP biosynthetic process          |
| 37      | 1.68E-09 | toll-like receptor signaling pathway                      |
| 38      | 1.32E-05 | negative regulation of protein metabolic process          |
| 39      | 4.99E-08 | RNA biosynthetic process                                  |
| 40      | 8.42E-10 | toll-like receptor signaling pathway                      |
| 41      | 1.11E-07 | DNA metabolic process                                     |
| 42      | 7.37E-06 | positive regulation of RNA metabolic process              |

|    |          |                                              |
|----|----------|----------------------------------------------|
| 43 | 1.97E-05 | cAMP metabolic process                       |
| 44 | 1.11E-05 | DNA packaging                                |
| 45 | 2.04E-04 | chromatin organization                       |
| 46 | 1.21E-06 | defense response                             |
| 47 | 9.70E-06 | transcription from RNA polymerase I promoter |
| 48 | 7.04E-07 | regulation of blood coagulation              |
| 49 | 6.11E-06 | RNA biosynthetic process                     |
| 50 | 1.11E-07 | toll-like receptor signaling pathway         |
| 51 | 1.31E-04 | lipoxygenase pathway                         |
| 52 | 6.90E-04 | alanine catabolic process                    |
| 53 | 1.27E-11 | neural crest cell migration                  |
| 54 | 2.18E-06 | apoptotic process                            |
| 55 | 6.76E-05 | RNA biosynthetic process                     |
| 56 | 4.99E-04 | DNA metabolic process                        |
| 57 | 1.67E-06 | platelet activation                          |

---

*Notes:* P-value is the probability of obtaining the observed effect, a very small P-value indicates that the observed effect is very unlikely to have arisen purely by chance, and therefore provides evidence against the null hypothesis.
