# Supplementary material for: The Mechanism Research of Qishen Yiqi Formula by Module-Network Analysis
Source: Hindawi journal article supplement (doi:10.1155/2015/497314), 2015-01-01
Supplement: f1 [file 497314.f1.zip]

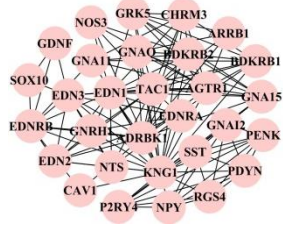

Module 1

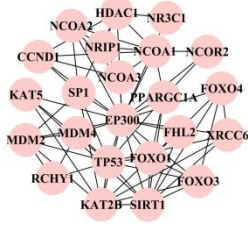

Module 2

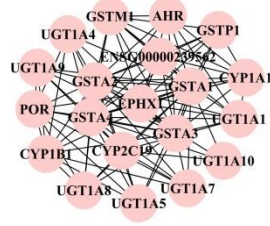

Module 3

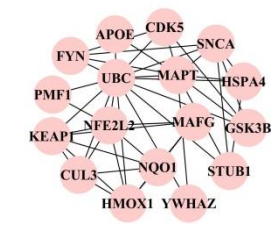

Module 4

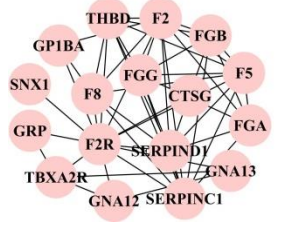

Module 5

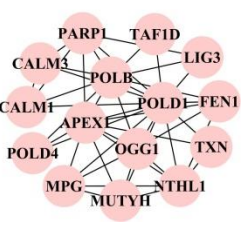

Module 6

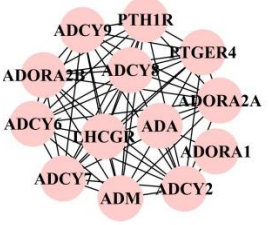

Module 7

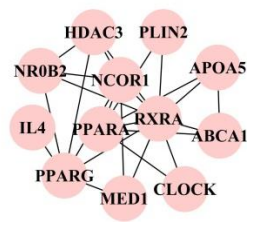

Module 8

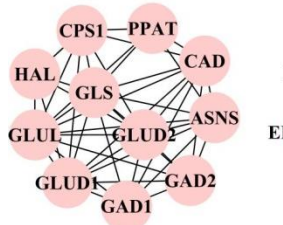

Module 9

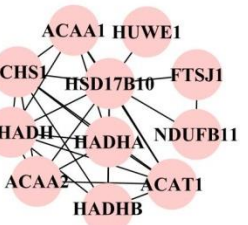

Module 10

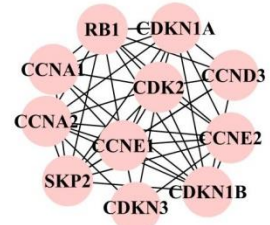

Module 11

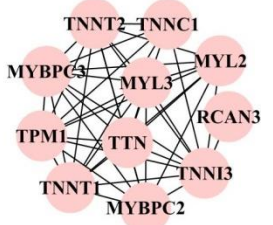

Module 12

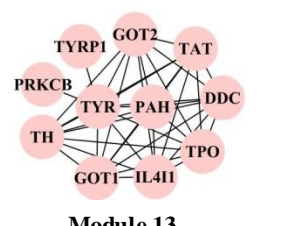

Module 13

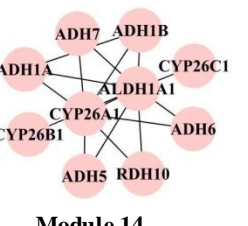

Module 14

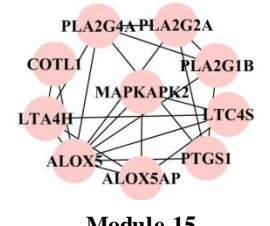

Module 15

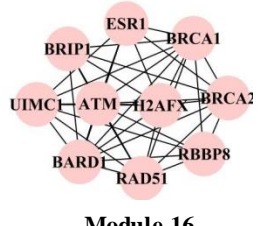

Module 16

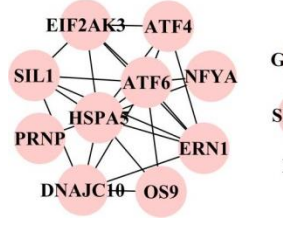

Module 17

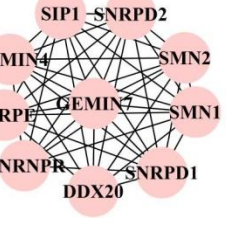

Module 18

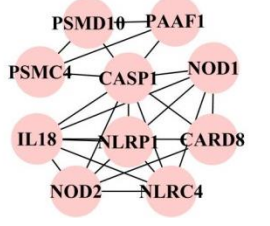

Module 19

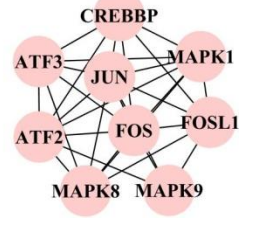

Module 20

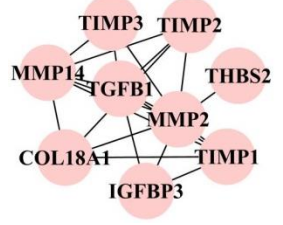

Module 21

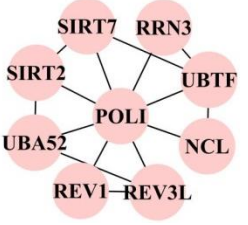

Module 22

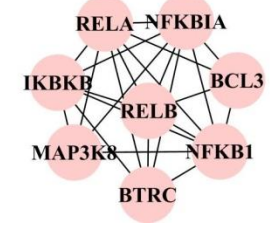

Module 23

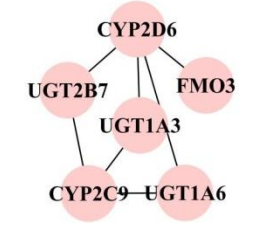

Module 24

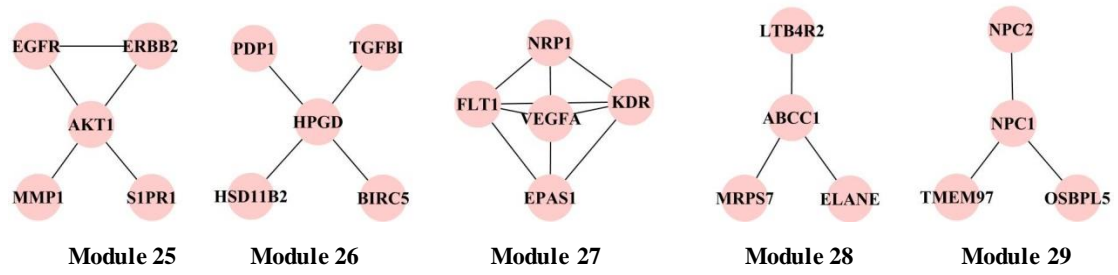

FIGURE S4: Modules in the PIN of *astragalus membranaceus*. With the MCL algorithm, 29 modules are extracted from the network.
