# Supplementary material for: The Mechanism Research of Qishen Yiqi Formula by Module-Network Analysis
Source: Hindawi journal article supplement (doi:10.1155/2015/497314), 2015-01-01
Supplement: f1 [file 497314.f1.zip]

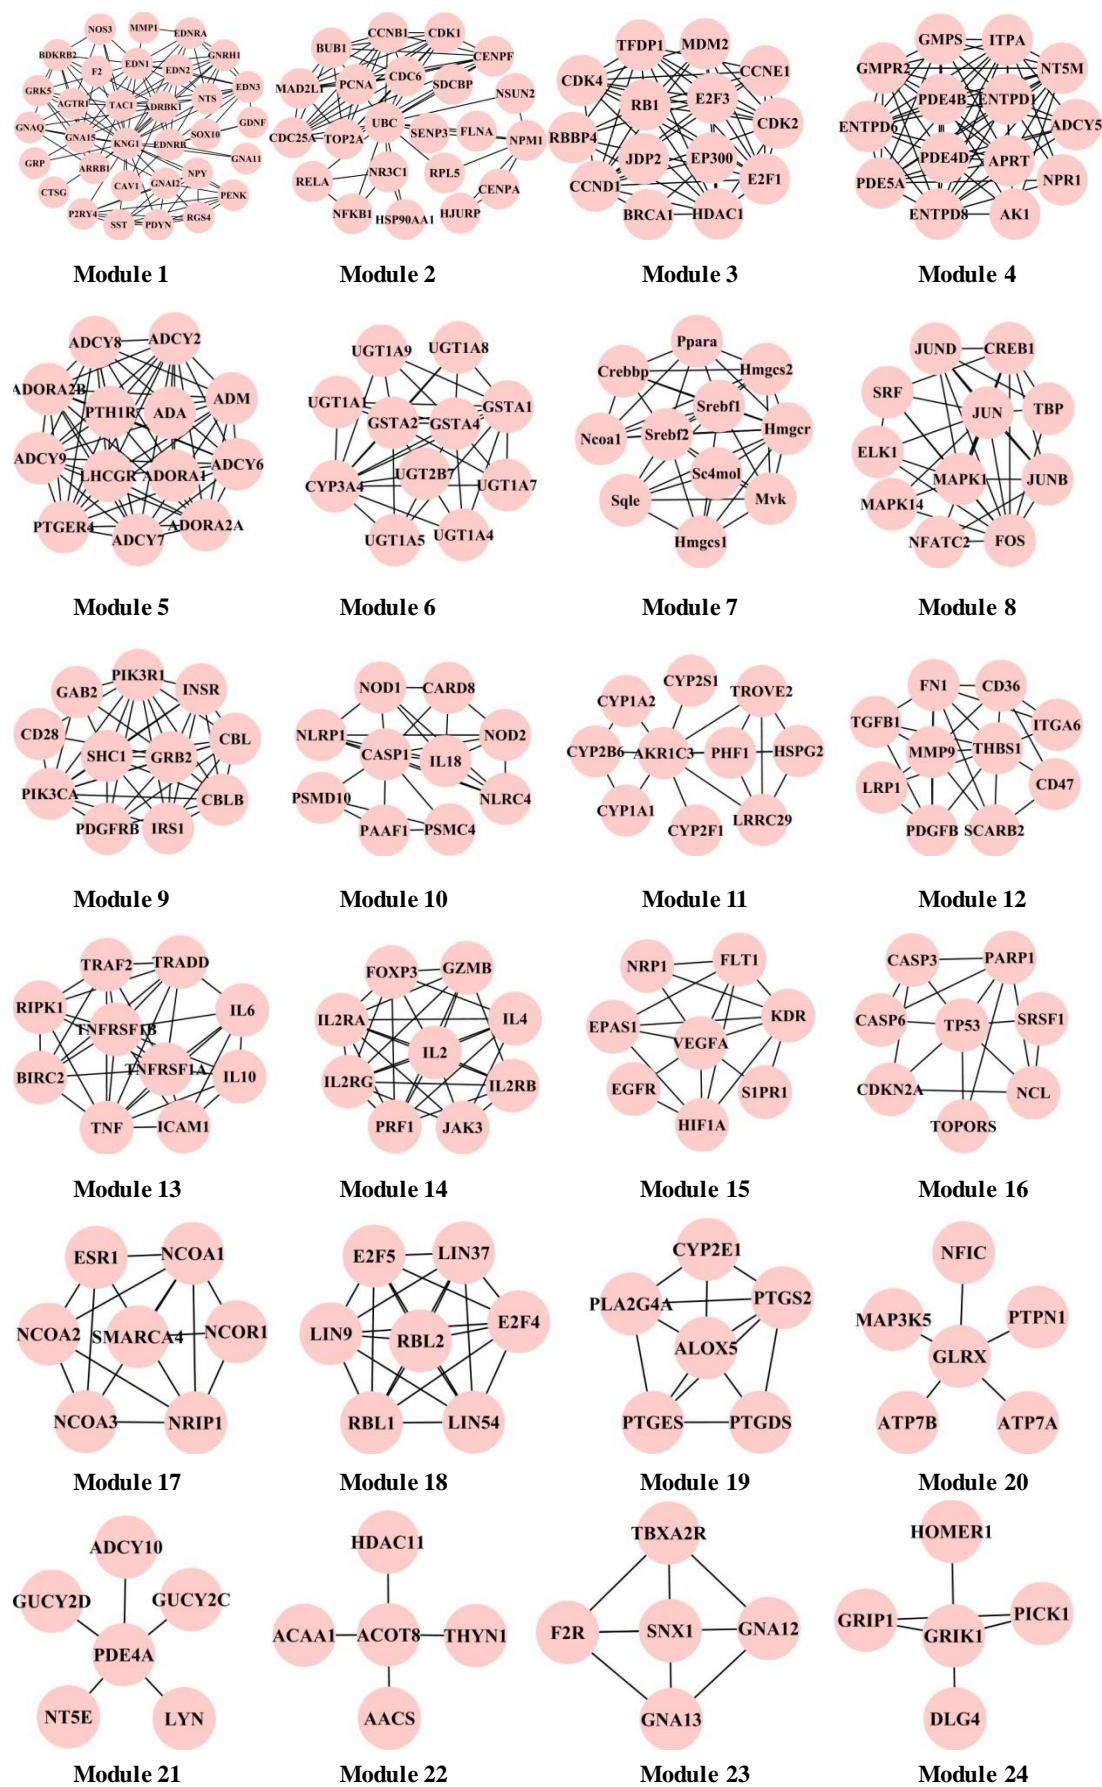

FIGURE S2: Modules in the PIN of *panax notoginseng*. With the MCL algorithm, 24 modules are

extracted from the network.
