# Supplementary material for: The Mechanism Research of Qishen Yiqi Formula by Module-Network Analysis
Source: Evid Based Complement Alternat Med. 2015 Aug 24;2015:497314. doi: 10.1155/2015/497314 (PMC4561322; doi:10.1155/2015/497314)
Supplement: Supplementary file 1 — Table S1 is about the additional targets' information of each active components from QSYQ. Tables S2–S5 are respective about the results of functional enrichment analysis of salvia miltiorrhiza, Panax notoginseng, Dalbergia odorifera,and Astragalus membranaceus. Figures S1–S4 are respective about the Modules in the PIN of salvia miltiorrhiza, panax notoginseng, dalbergia odorifera, astragalus membranaceus. [file 497314.f1.zip]

Archive with 10 entries (9 files):
- supplementary materials/
- supplementary materials/FIGURE S1. Modules in the PIN of salvia miltiorrhiza.pdf
- supplementary materials/FIGURE S2. Modules in the PIN of panax notoginseng.pdf
- supplementary materials/FIGURE S3. Modules in the PIN of dalbergia odorifera..pdf
- supplementary materials/FIGURE S4. Modules in the PIN of astragalus membranaceus.pdf
- supplementary materials/TABLE S1 The additional targets' information of the active components of DQAFs.pdf
- supplementary materials/TABLE S2 GO biological process terms of the modules of salvia miltiorrhiza.pdf
- supplementary materials/TABLE S3 GO biological process terms of the modules of panax notoginseng.pdf
- supplementary materials/TABLE S4 GO biological process terms of the modules of dalbergia odorifera.pdf
- supplementary materials/TABLE S5 GO biological process terms of the modules of astragalus membranaceus.pdf
